# Supplementary material for: Casein kinase 2 α and β subunits inversely modulate ABA signal output in Arabidopsis protoplasts
Source: PubMed Central journal article supplement (PMC6244648; doi:10.1007/s00425-018-2919-5), 2018-05-24
Supplement: 425_2018_2919_MOESM1_ESM.pdf [file 425_2018_2919_MOESM1_ESM.pdf]

Supplemental Table S1. Primers used in this study.

| Primer Name                                                                            | Seq (5'-3')                                              |
|----------------------------------------------------------------------------------------|----------------------------------------------------------|
| <b>Primers used to construct pSKX-based plasmids for transient expression analysis</b> |                                                          |
| pGKXEI2-5'PstHind                                                                      | gtcctgcagaagcttGGAGCTTGCCAACA                            |
| pGrMCS-3'                                                                              | GATGTGCTGCAAGGCGATTAAG                                   |
| #5-CKA1.2s-BamHI                                                                       | agaggatccATGATAGATACGCTTTTCTTCTTG                        |
| #12-CKA1.3as-SacI                                                                      | tcgagctcTCATTGACTTCTCATTCTGCT                            |
| #7-CKA2.1s-BamHI                                                                       | agaggatccATGCACCTAATCTTCTTCTTCTC                         |
| #13-CKA2.2as-SacI                                                                      | tcgagctcCTATTGAGTCCTCATCTGCTG                            |
| #1-CKA3.1s-BamHI                                                                       | agaggatccATGTGCAAAGCTAGGGTTTA                            |
| #14-CKA3.2as-SacI                                                                      | tcgagctcTACTGAGTTCGTAGTCTGCTGC                           |
| #3-CKA4.1s-BamHI                                                                       | agaggatccATGGCCTTAAGGCCTTG                               |
| #11-CKA4.3as-SacI                                                                      | tcgagctcTCACTGGCTGCGCGGCTACGGCTGCTCTCTGCATT              |
| #15-CKB1.1s-BamHI                                                                      | gaggatccATGTATAGAGACAGAGGAAC                             |
| #72-CKB1.1-as-sacI                                                                     | tcgagctcTCACGGTTTGTGTAATTTG                              |
| #17-CKB2.1s-BamHI                                                                      | gaggatccATGTATAGGGAGAGAGGTATG                            |
| #18-CKB2.1as-SacI                                                                      | tcgagctcTCACGGCTTGTGTAG                                  |
| #19-CKB3.1s-BamHI                                                                      | gaggatccATGTACAAGGAACGTAG                                |
| #20-CKB3.1as-SacI                                                                      | tcgagctcTCATGGTTTGTGTAC                                  |
| #21-CKB4.1s-BamHI                                                                      | gaggatccATGTACAAGGATCGG                                  |
| #22-CKB4.1s-SacI                                                                       | tcgagctcTCATTGTTTGTGTGTAC                                |
| 15ABIIF-NotI                                                                           | cccgcggccgcATGGAGGAAGTATCTCCGGCGATC                      |
| 16ABI1R1-StuI                                                                          | CAGATCCTCCTCAGAAATCAGCTTTTGCTCAGGCCTGTTC AAGGTTTGTCTTGAG |
| 31ABI1R4-dMyc-SmaI                                                                     | CTTCTTCGCTTATTAATTTCTGTTCCAGATCCTCCTCAG                  |
| 32ABI1R5-dMyc-SmaI                                                                     | gcgcccgggTCATAAGTCTTCTTCGCTTATTAATTTCTG                  |
| 27SRK2DF-NotIa                                                                         | cccgcggccgcATGGATCCGGCGACTAATTC                          |
| 28SRK2DR1-StuIa                                                                        | GTCTTGTAGTCAGAAGGCCTGAGAGCATAAACTATCTCTCC                |
| 14SRK2DR2-Flag-EcoRV                                                                   | cccgatatcTCACTTGTATCGTCGTCCTTGTAGTCAGAAG                 |
| 29His-NcoI-PYL1F1a                                                                     | CACCATCACccatgATGGCGAATTCAGAG                            |
| 30PYL1R-EcoRVa                                                                         | cccgatatcTTACCTAACCTGAGAAGAG                             |
| 25NotI-His-NcoI-PYL1F2                                                                 | cccgcggccgcATGAAACATCACCATCACCATCACccatgATG              |

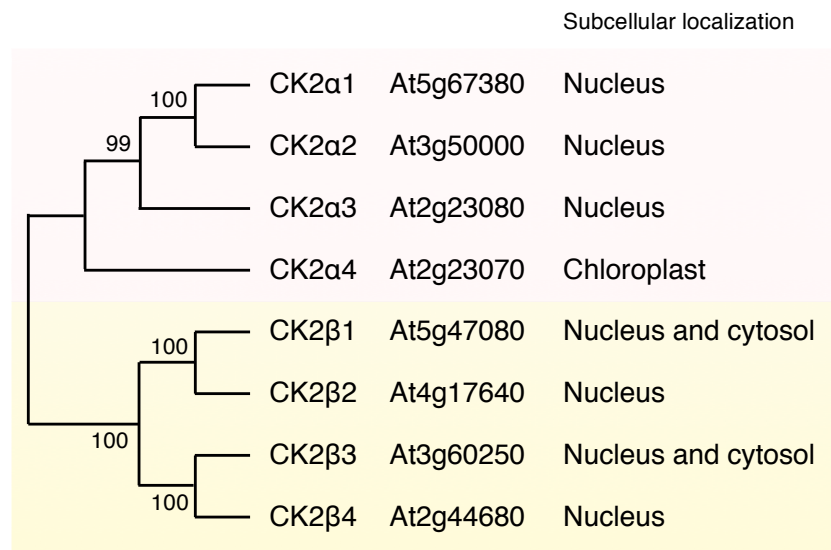

### Supplemental Figure S1. Phylogenetic Tree of CK2 $\alpha$ s and CK2 $\beta$ s in *Arabidopsis*

Phylogenetic Tree of CK2 $\alpha$ s and CK2 $\beta$ s in *Arabidopsis*. The neighbor-joining phylogenetic tree (Saitou, Nei 1987) was created using MEGA7 (Kumar et al. 2016). The optimal tree with the sum of branch length = 1.25324778 is shown. Bootstrap values (1,000 replicates) are shown next to the branches (Felsenstein. 1985). Evolutionary distances were computed using the p-distance method (Nei, Kumar 2000); units represent the number of amino acid differences per site. The subcellular localization of each CK2 is based on previous reports (Salinas et al. 2006; Perales et al. 2006; Portoles, Mas 2010; Mulekar, Huq 2015). CK2 $\alpha$ s and CK2 $\beta$ s are shaded in pink and in yellow, respectively.

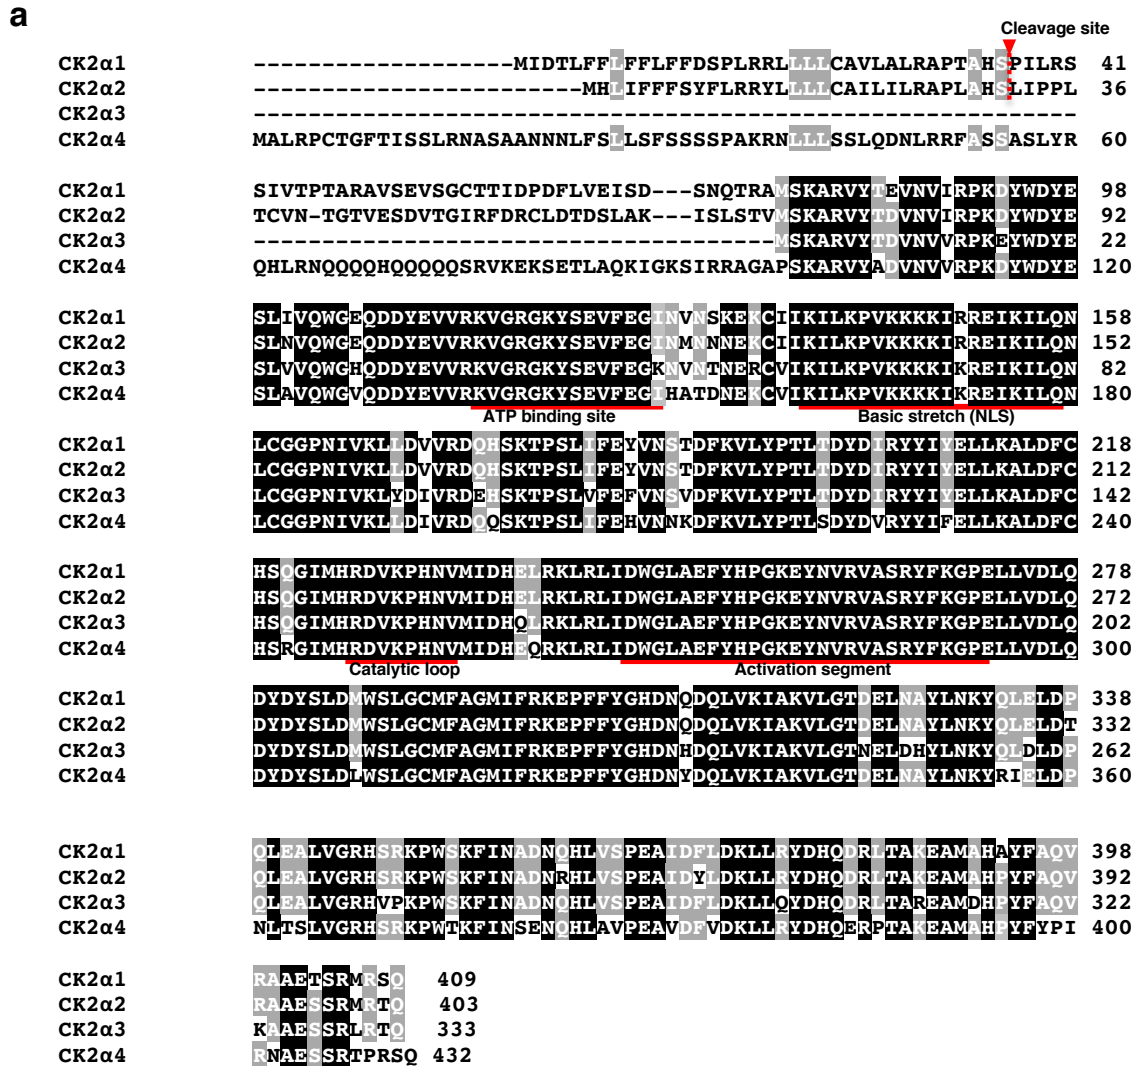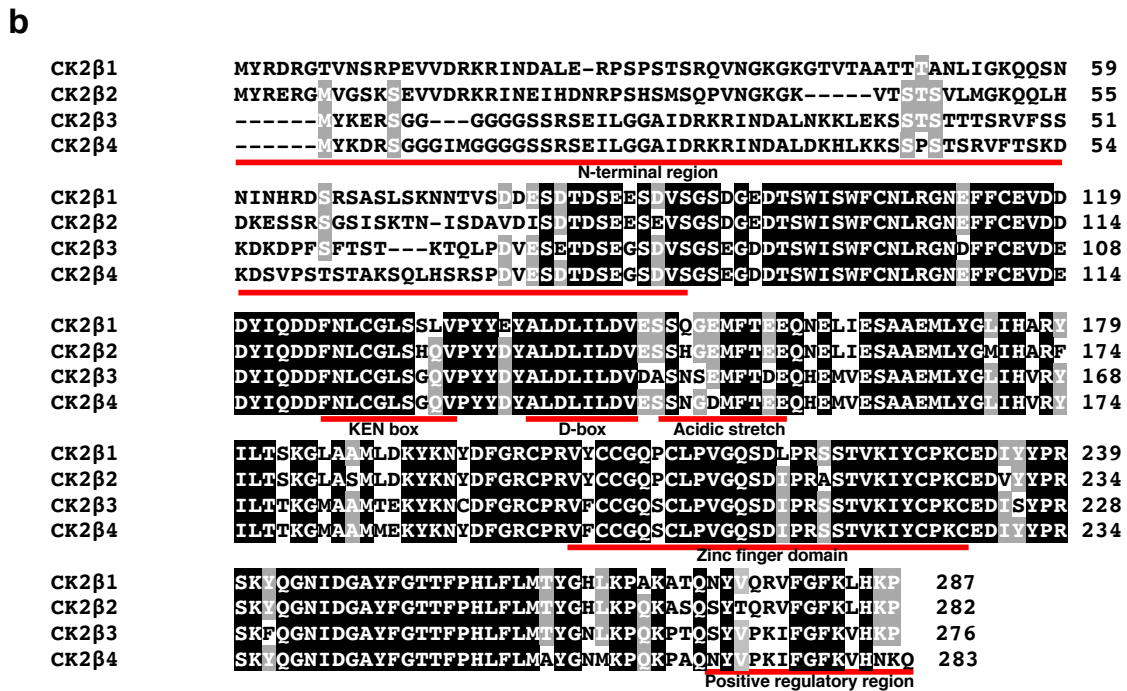

### Supplemental Figure S2. Alignment of CK2 Amino Acid Sequences in *Arabidopsis*

Comparison of amino acid sequences of CK2 $\alpha$ s **a** and CK2 $\beta$ s **b**. Conservation ratio at each site is shown by shading (black, 100%; gray, 75%). Red bars mark reported characteristic domains. Red arrow indicates a signal peptide cleavage site detected by SignalP 4.1 Server (Petersen et al. 2011).

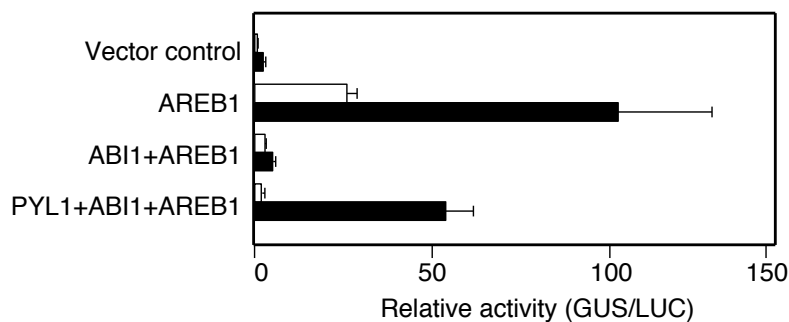

**Supplemental Figure S3. Reconstitution of ABA signaling pathway by co-transfection of AREB1, ABI1 and PYL1.**

Protoplasts were isolated from WT leaves. *RD29B-GUS* (5.0 μg of plasmid per transformation) and *pBI35SΩ-ELUC* (1.0 μg per transfection) were used as the ABA-responsive reporter and internal control, respectively. Each transfection used 2.5 μg of effector plasmid, except for ABI1, which used 1.5 μg per transfection. Total amounts of effector DNA were 6.5 μg, which include effector plasmids alone or combined with the vector control plasmid *pSKX* for transient expression analysis. ‘Relative activity’ indicates combined expression relative to the value obtained from the vector control. After transfection, protoplasts were incubated for 14-18 h under dark conditions without ABA (open bars) or with 2.0 μM ABA (filled bars). Error bars indicate SD ( $n = 4$ ). Experiments were performed at least three times, and a representative result is shown.
